# Supplementary material for: Comprehensive Analysis of GABAA-A1R Developmental Alterations in Rett Syndrome: Setting the Focus for Therapeutic Targets in the Time Frame of the Disease
Source: MDPI journal article supplement (doi:10.3390/ijms21020518), 2020-01-14
Supplement: s1 [file s1]

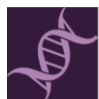

## SUPPLEMENTARY MATERIAL

# Comprehensive Analysis of GABA<sub>A</sub>-A1R Developmental Alterations in Rett Syndrome: Setting the Focus for Therapeutic Targets in the Time Frame of the Disease

Alfonso Oyarzabal <sup>1,\*</sup>, Clara Xiol <sup>2,†</sup>, Alba Aina Castells <sup>2,†</sup>, Cristina Grau <sup>1</sup>, Mar O'Callaghan <sup>3</sup>,  
Guerau Fernández <sup>2</sup>, Soledad Alcántara <sup>4</sup>, Mercè Pineda <sup>3</sup>, Judith Armstrong <sup>2</sup>, Xavier Altafaj <sup>5,‡</sup>,  
and Angels García-Cazorla <sup>1,‡</sup>

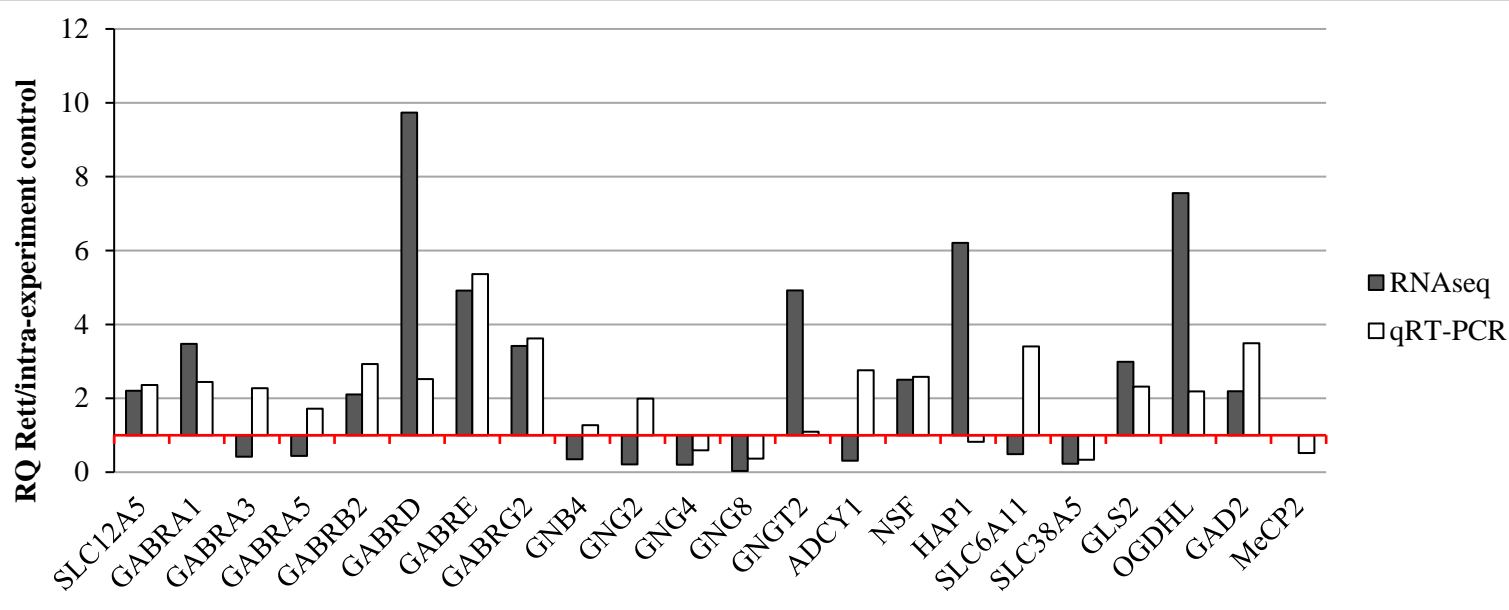

**Supplementary Figure 1: RNAseq experiment validation through qPCR:** The qRT-PCR measurements showed that 20 out of the 21 genes called as differentially expressed in the RNAseq experiment were also called as differentially expressed in the qRT-PCR experiment, thus validating the results.
